# Supplementary material for: Three-Month Follow-Up of Heterologous vs. Homologous Third SARS-CoV-2 Vaccination in Kidney Transplant Recipients: Secondary Analysis of a Randomized Controlled Trial
Source: Frontiers journal article supplement (doi:10.3389/fmed.2022.936126), 2022-07-22

# Three-Month Follow-Up of Heterologous vs. Homologous Third SARS-CoV-2 Vaccination in Kidney Transplant Recipients: Secondary Analysis of a Randomized Controlled Trial

Andreas Heinzl, Eva Schretzenmeier, Florina Regele, Karin Hu, Lukas Raab, Michael Eder, Christof Aigner, Rhea Jabbour, Constantin Aschauer, Ana-Luisa Stefanski, Thomas Dörner, Klemens Budde, Roman Reindl-Schwaighofer\* and Rainer Oberbauer

### Supplementary Figure S1:

FACS analysis scheme for identifying SARS-CoV-2 specific CD4 and CD8 T-cells based on co-expression of CD137 and CD154 and CD137 and IFN- $\gamma$ , respectively.

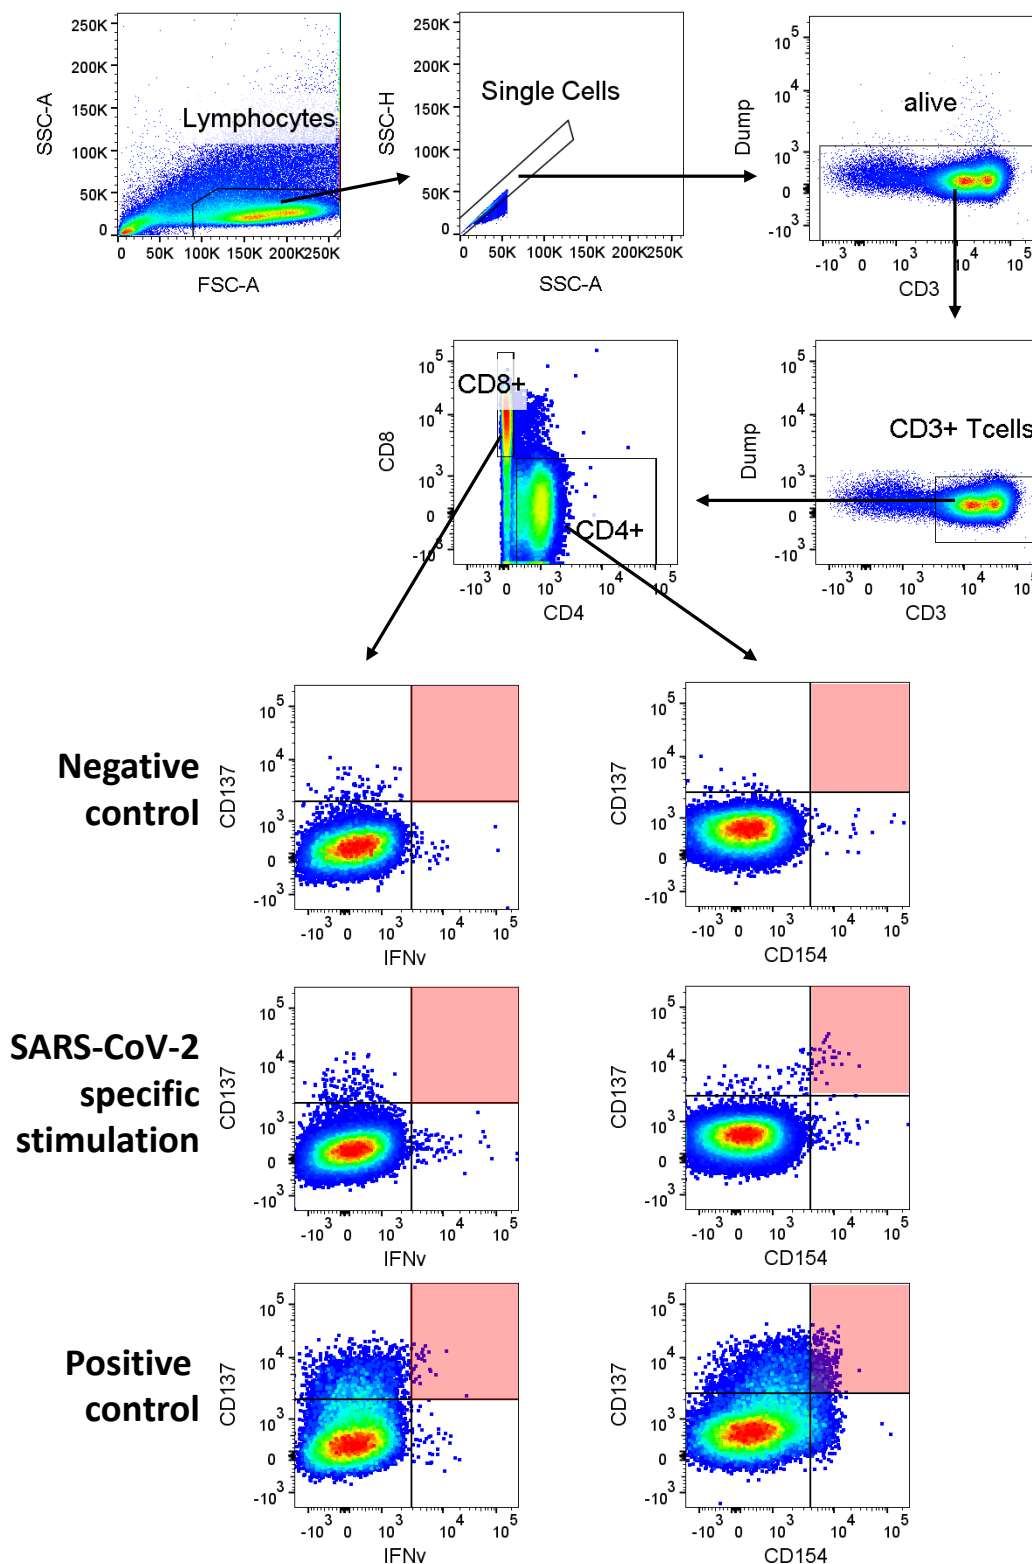

Supplement: Image_1.pdf [file Image_1.pdf]
